# Supplementary material for: Evidence-based health and clinical informatics: a systematic review on randomized controlled trials
Source: Springer Nature journal article supplement (doi:10.1007/s12553-016-0170-2), 2017-01-21
Supplement: MOESM6 [file 12013048]

Table 6.1: Clinical trials per HealthCare Domain and Technological field

| [HealthCare] X [Tech] | Internet  *(14 studies/12 trials)* | Mobile  *(29 studies/25 trials)* | Social support  *(3 studies/2 trials)* | Computer-based; computer- assisted decision support  *(12 studies/11 trials)* | Tele-health  *(1 study/1 trial)* | Virtual advisor  *(1 study/1 trial)* | Electronic health record–based  *(1 study/1 trial)* |
| --- | --- | --- | --- | --- | --- | --- | --- |
| Cancer  *(4 studies/4 trials)* | NCT00558233  NCT00244868  ISRCTN27988779 | ISRCTN67370244 |  |  |  |  |  |
| Cardiovascular; Hypertension  *(5 studies/4 trials)* | ISRCTN72614272 (2 studies)  NCT01223170  ACTRN12611000117910  ACTRN12611000481976 | ISRCTN72614272 (2 studies)  NCT01223170  ACTRN12611000117910  ACTRN12611000481976 | ACTRN12611000481976 |  |  |  |  |
| Diabetes; Dyslipidemia  *(3 studies/3 trials)* |  | IRCT201112158416N1  NCT01403831 |  | NCT00348751 |  |  |  |
| Diet and Nutrition; Exercise; Activities of Daily Living; Health Behavior; Lifestyle; Public Health and other Healthy subjects  *(8 studies/7 trials)* | NCT01139255 (2 studies)  ACTRN12611000081910 | NCT01139255 (2 studies)  NCT00415870  NCT01092364  ACTRN12611000081910  DRKS00004685 | NCT01139255  (2 studies) | NCT01398488 |  | NCT01144767 |  |
| Infections  *(4 studies/4 trials)* |  | NCT01058694  PACTR201304000528276  PACTR201011000261458 |  | NCT00731315 |  |  |  |
| Mental health;Depression;Addictions  *(16 studies/16 trials)* | ACTRN12610000625077  NCT00886730  NCT00828152 | ACTRN12610000625077  ACTRN12606000476538  ACTRN12609000405213  ACTRN12611001257954  NCT01958398  NCT00794222  ISRCTN10515845 |  | NCT01584882  ACTRN12607000437460  NCT01072500 (the same article includes 2 trials)  NCT01598220  NCT00688155 (the same article includes 2 trials)  NCT00818285 |  |  | NCT00383461 |
| Reproductive Health and Childbirth  *(2 studies/1 trial)* |  | NCT01821222 (2 studies) |  |  |  |  |  |
| Respiratory  *(3 studies/2 trials)* |  | NCT00367263  NCT00512837 (2 studies) |  |  |  |  |  |
| Screening for Partner Violence  *(1 study/1 trial)* |  |  |  | NCT00385034 |  |  |  |
| Stroke  *(1 study/1 trial)* |  |  |  |  | NCT01655264 |  |  |
| Older adults  *(1 study/1 trial)* |  |  |  | NCT00297869 |  |  |  |

| **General characteristics of the studies of cancer health domain** | | | | | | | | | |
| --- | --- | --- | --- | --- | --- | --- | --- | --- | --- |
| **Trial**  **(Registration Number)[[1]](#footnote-1)** | **Article**  **(Publication Describing Study Results)** | **Registration year of the trial** | | | **Blinded** | **Target size**  **(enrollment)** | **Publication year of the article** | **Typeof the trial** | **Type of the trial in accordance of the involved HITs** |
| ISRCTN27988779 | (Lana, et al., 2014) | 2009 | | | Unclear | 3000 | 2014 | Prevention (review authors estimation) | *CBA[[2]](#footnote-2)* |
| ISRCTN67370244 | (Kearney, et al., 2009) | 2005 | | | Unclear | 150 | 2009 | Screening (review authors estimation) | *CBA* |
| NCT00244868 | (Meropol, et al., 2013) | 2005 | | | Unclear | 720 | 2013 | Treatment (review authors estimation) | *DSS[[3]](#footnote-3)* |
| NCT00558233 | (Miller Jr, et al., 2011) | 2007 | | | Single blind | 350 | 2011 | Health Services Research | *CBA* |
| **General characteristics of the studies of cardiovascular; hypertension and public health domain** | | | | | | | | | |
| **Trial** | **Article** | **Registration year of the trial** | | **Blinded** | | **Target size**  **(enrollment)** | **Publication year of the article** | **Typeof the trial** |  |
| ACTRN12611000117910 | (Pfaeffli, et al., 2012) | 2010 | | Double blind | | 170 | 2012 | Supportive Care (review authors estimation) | *CBA* |
| ACTRN12611000481976 | (Fjeldsoe, et al., 2012) | 2011 | | Unclear | | 400 | 2012 | Supportive Care (review authors estimation) | - *CBA* |
| ISRCTN72614272 | (McKinstry, et al., 2013) | 2008 | | Unclear | | 400 | 2013 | Screening (review authors estimation) | - *DSS and CBA* |
| ISRCTN72614272a | (Stoddart, et al., 2013) | 2008 | | Unclear | | 400 | 2013 | Screening (review authors estimation) | *DSS and CBA* |
| NCT01223170 | (Antypas, et al., 2014) | 2010 | | Double blind | | 255 | 2014 | Supportive Care | - *CBA* |
| **General characteristics of the studies of the diabetes; dyslipidemia health domain** | | | | | | | | |  |
| **Trial** | **Article** | **Registration year of the trial** | | | **Blinded** | **Target size**  **(enrollment)** | **Publication year of the article** | **Typeof the trial** |  |
| IRCT201112158416N1 | (Goodarzi, et al., 2012) | 2011 | | | Not blinded | 100 | 2012 | Treatment (review authors estimation) | CBA |
| NCT00348751 | (van Wyk, et al., 2008) | 2006 | | | Open | 88001 | 2008 | Treatment (review authors estimation) | CBA, DSS and EHR[[4]](#footnote-4) |
| NCT01403831 | (Arora, et al., 2012) | 2011 | | | Open | 200 | 2012 | Health Services Research | CBA |
| **General characteristics of the studies of the diet and nutrition; exercise; activities of daily living; health behavior health; lifestyle and public health health domain and other healthy subjects** | | | | | | | | |  |
| **Trial** | **Article** | | **Registration year of the trial** | | **Blinded** | **Target size**  **(enrollment)** | **Publication year of the article** | **Typeof the trial** |  |
| NCT00415870 | (Norman, et al., 2013) | | 2007 | | Open | 60 | 2013 | Treatment | CBA |
| NCT01092364 | (Batch, et al., 2014) | | 2010 | | Double blind | 300 | 2014 | Treatment | CBA |
| NCT01139255 | (Turner-McGrievy, et al., 2011) | | 2010 | | Open | 104 | 2011 | Treatment | CBA |
| NCT01139255a | (Turner-McGrievy, et al., 2013) | | 2010 | | Open | 104 | 2013 | Treatment | CBA |
| NCT01144767 | (King, et al., 2013) | | 2010 | | Single blind | 40 | 2013 | Prevention | CBA |
| ACTRN12611000081910 | (Short, et al., 2014) | 2011 | | | Double blind | 504 | 2014 | Health Services Research (review authors estimation) | CBA |
| NCT01398488 | (Suhling, et al., 2014) | 2011 | | | Open | 62 | 2014 | Supportive Care | Other (Tablet-PC Educational system) |
| DRKS00004685 | (Albrecht, et al., 2013) | 2013 | | | Single blind | 10 | 2013 | Health Services Research (review authors estimation) | Other (Educational via mobile) |
| **General characteristics of the studies of infections health domain** | | | | | | | | |  |
| **Trial** | **Article** | | **Registration year of the trial** | | **Blinded** | **Target size**  **(enrollment)** | **Publication year of the article** | **Typeof the trial** |  |
| NCT00731315 | (Stein, et al., 2011) | | 2008 | | Double blind | 400 | 2011 | Health Services Research | Other (Computer Kiosk–expedited Management of care) |
| NCT01058694 | (Pop-Eleches, et al., 2011) | | 2010 | | Open | 720 | 2011 | Supportive Care | CBA |
| PACTR201011000261458 | (Mbuagbaw, et al., 2013) | | 2010 | | Double blind | 198 | 2013 | Treatment (review authors estimation) | CBA |
| PACTR201304000528276a | (Bigna, et al., 2014) | | 2013 | | Double blind | 224 | 2014 | Treatment (review authors estimation) | CBA |
| **General characteristics of the studies of the mental health; depression and addictions health domain** | | | | | | | | |  |
| **Trial** | **Article** | **Registration year of the trial** | | | **Blinded** | **Target size**  **(enrollment)** | **Publication year of the article** | **Typeof the trial** |  |
| (NCT00688155 NCT01072500) of NCT00688155 | (Espeland, et al., 2013) | 2008 | | | Single blind | 100 | 2013 | Prevention | Other (Computer-administered assessment of cognitive function) |
| (NCT00688155 NCT01072500) of NCT01072500 | (Espeland, et al., 2013) | 2010 | | | Single blind | 1600 | 2013 | Prevention | Other (Computer-administered assessment of cognitive function) |
| ACTRN12606000476538 | (Whittaker, et al., 2011) | 2006 | | | Double blind | 1300 | 2011 | Treatment | CBA |
| ACTRN12607000437460 | (Kay-Lambkin, et al., 2011) | 2007 | | | Double blind | 100 | 2011 | Treatment (review authors estimation) | Other (Computer based Management of care) |
| ACTRN12609000405213 | (Whittaker, et al., 2011) | 2009 | | | Double blind | 790 | 2011 | Prevention (review authors estimation) | CBA |
| ACTRN12610000625077 | (Proudfoot, et al., 2013) | 2010 | | | Double blind | 2000 | 2013 | Supportive Care (review authors estimation) | CBA |
| ACTRN12611001257954 | (Watts, et al., 2013) | 2011 | | | Open | 126 | 2013 | Treatment (review authors estimation) | Other (Computer based Management of care) and CBA (possibility) |
| ISRCTN10515845 | (Crombie, et al., 2013) | 2010 | | | Unclear | 50 | 2013 | Treatment (review authors estimation) | CBA |
| NCT00383461 | (Linder, et al., 2009) | 2006 | | | Unclear | 4314 | 2009 | Treatment (review authors estimation) | CBA and EHR |
| NCT00794222 | (Reid, et al., 2011) | 2008 | | | Double blind | 200 | 2011 | Prevention | Other (mobile phone based Management of care) |
| NCT00818285 | (Tamblyn, et al., 2012) | 2009 | | | Single blind | 4800 | 2012 | Treatment | CPOE[[5]](#footnote-5) (Computerized drug safety in phycisian Order entry) and EHR |
| NCT00828152 | (Hedman, et al., 2011) | 2009 | | | Open | 80 | 2011 | Treatment | Other (Internet-based Management of care - Cognitive behaviour therapy for severe health anxiety) |
| NCT00828152 | (Hedman, et al., 2013) | 2009 | | | Open | 80 | 2013 | Treatment | Other (Internet-based based Management of care) |
| NCT00886730 | (Van Voorhees, et al., 2013) | 2009 | | | Single blind | 110 | 2013 | Supportive Care | Other (Computerized Management of care) |
| NCT01584882 | (Rindal, et al., 2013) | 2012 | | | Open | 548 | 2013 | Health Services Research | DSS - Decision Support Systems (or clinical decision support tools) and EHR |
| NCT01598220 | (Garrido, et al., 2013) | 2012 | | | Single blind | 135 | 2013 | Treatment | Other (Computerized Management of care) |
| NCT01958398 | (Berman, et al., 2013) | 2013 | | | Single blind | 4408 | 2013 | Treatment | CBA |
| **General characteristics of the studies of the respiratory health domain** | | | | | | | | |  |
| **Trial** | **Article** | **Registration year of the trial** | | | **Blinded** | **Target size**  **(enrollment)** | **Publication year of the article** | **Typeof the trial** |  |
| NCT00367263 | (Meltzer, et al., 2008) | 2006 | | | Open | 12 | 2008 | Treatment | Other (Computerized Management of care) and CBA |
| NCT00512837 | (Ryan, et al., 2012) | 2007 | | | Single blind | 312 | 2012 | Supportive Care | Other (Computerized Management of care) |
| NCT00512837a | (Malhotra, et al., 2012) | 2007 | | | Single blind | 312 | 2012 | Supportive Care | Other (Computerized Management of care) |
| **General characteristics of the studies of the other subjects’ health domain** | | | | | | | | |  |
| **Trial** | **Article** | **Registration year of the trial** | | | **Blinded** | **Target size**  **(enrollment)** | **Publication year of the article** | **Typeof the trial** |  |
| NCT00297869 | (Terrell, et al., 2009) | 2006 | | | Double blind | 954 | 2009 | Treatment | CPOE |
| NCT00385034 | (Ahmad, et al., 2009) | 2005 | | | Open | 280 | 2009 | Screening | Other (Computerized Management of care) |
| NCT01655264 | (Kizony, et al., 2013) | 2012 | | | Single blind | 24 | 2013 | Treatment | Other (Computerized Management of care) |
| NCT01821222 | (Lund, et al., 2014) | 2013 | | | Open | 2550 | 2014 | Health Services Research | Other (Computerized Management of care) |
| NCT01821222a | (Lund, et al., 2014) | 2013 | | | Open | 2550 | 2014 | Health Services Research | Other (Computerized Management of care) |

**Table 6.2: Description of the studies in relation with health domain**

1. *The registration number of the clinical trial. In some cases that a trial appears in more than one trial described by adding a letter at the end of the reg.number (e.g. ISRCTN72614272a)* [↑](#footnote-ref-1)
2. ***CBA - Computer based alerts and reminders systems****, but more over were included systems that encourage self-monitoring and self-reported management system, especially as text messages (sms), calls, emails, video, video messaging and long texts via mobiles, podcasts and personal web services and Virtual Advisors as consultants and updaters …* *were seen as a good reminder to exercise, medication* *medication taking, diet, follow-up etc. Also, CBA and Management of Care (MC) in most of the cases was difficult to differ in some others we put the MC in the others category.* [↑](#footnote-ref-2)
3. ***DSS - Decision Support Systems*** [↑](#footnote-ref-3)
4. ***EHR - Electronic Health Record* systems**. Nowdays the most systems are personalized but without a strict standardization and usually participants report a history of their health conditions in the system. [↑](#footnote-ref-4)
5. ***CPOE - Computerized Provider Order entry*** [↑](#footnote-ref-5)
